# Supplementary material for: BMP9-ID1 Signaling Activates HIF-1α and VEGFA Expression to Promote Tumor Angiogenesis in Hepatocellular Carcinoma
Source: MDPI journal article supplement (doi:10.3390/ijms23031475), 2022-01-27
Supplement: s1 [file s1]

Supplementary Materials:

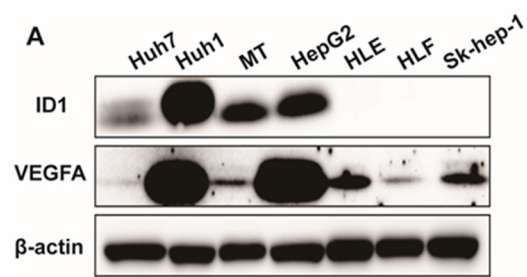

Figure S1. (A) Constitutive ID1 and VEGFA expression of representative HCC cell lines Huh7, Huh1, MT, HepG2, HLE, HLF, and Sk-hep-1.
